# Supplementary material for: mRNA m6A regulates gene expression via H3K4me3 shift in 5’ UTR
Source: Springer Nature journal article supplement (doi:10.1186/s13059-025-03515-8), 2025-03-12
Supplement: MOESM1 [file 13059_2025_3515_MOESM1_ESM.pdf]

Additional File 1

1. Fig. S1. m<sup>6</sup>A methylation in *Arabidopsis* and *Oryza sativa*.
2. Fig. S2. m<sup>6</sup>A methylation deposits in the 5' UTR of mRNA shifted H3K4me3 histone modification.
3. Fig. S3. Genotyping of T-DNA insertion mutants and m<sup>6</sup>A levels in different plants.
4. Fig. S4. The negative control of MTA and ATX1 interact with CTD of RNA Pol II.
5. Fig. S5. The diagram to show the T-DNA insertion for *alkbh10b-1*.

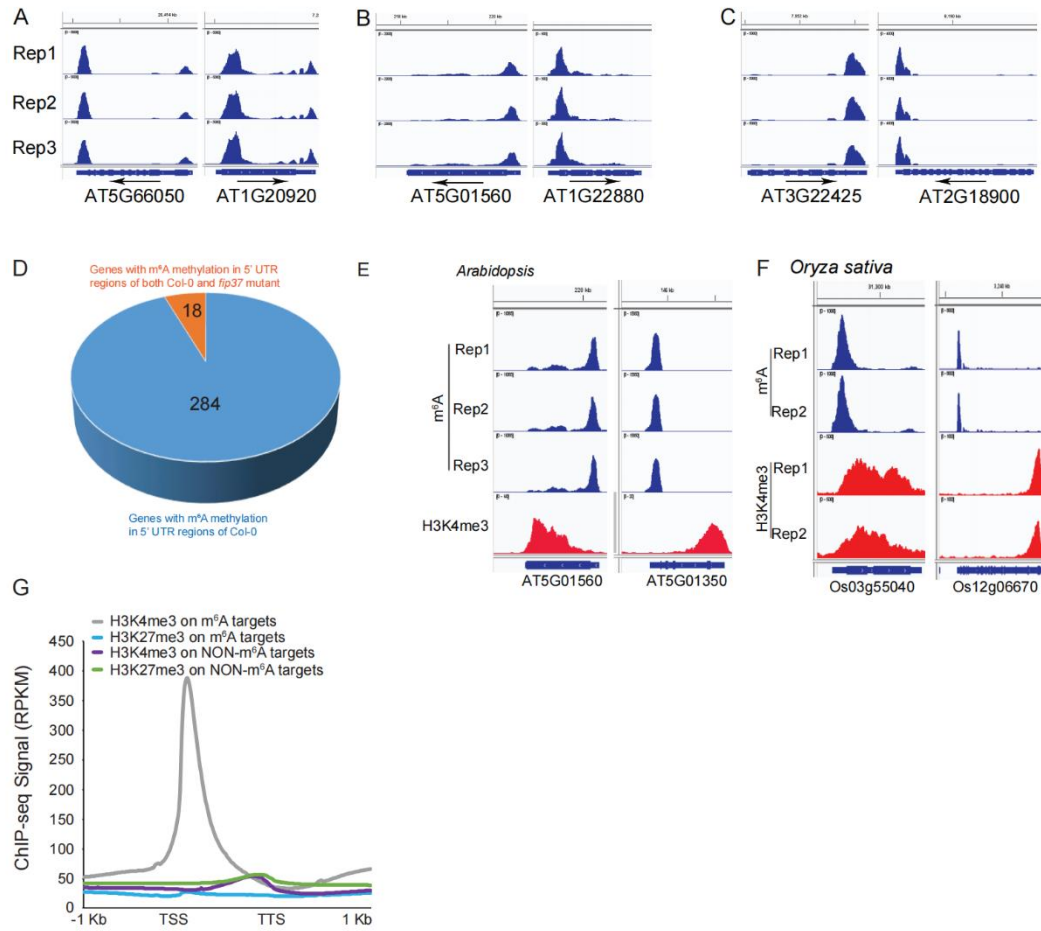

**Fig. S1.** m<sup>6</sup>A methylation in *Arabidopsis* and *Oryza sativa*. **A-C** Genes with m<sup>6</sup>A methylation in both 5' UTR and 3' UTR region (m<sup>6</sup>A<sub>53</sub>) (**A**), genes with m<sup>6</sup>A methylation only in 5' UTR region (m<sup>6</sup>A<sub>5</sub>) (**B**) and genes with m<sup>6</sup>A methylation only in 3' UTR region (m<sup>6</sup>A<sub>3</sub>) (**C**) were shown. **D** The genes with m<sup>6</sup>A modification in 5' UTR regions uniquely detected in Col-0 (blue), and shared with *fip37* mutant (orange). **E** Genome browser traces of m<sup>6</sup>A-seq and H3K4me3 ChIP-seq data from representative genes in *Arabidopsis*. **F** Genome browser traces of m<sup>6</sup>A-seq and H3K4me3 ChIP-seq data from representative genes in *Oryza sativa*. **G** Distribution of H3K4me3 or H3K27me3 reads in transcript segments with or without m<sup>6</sup>A modification.

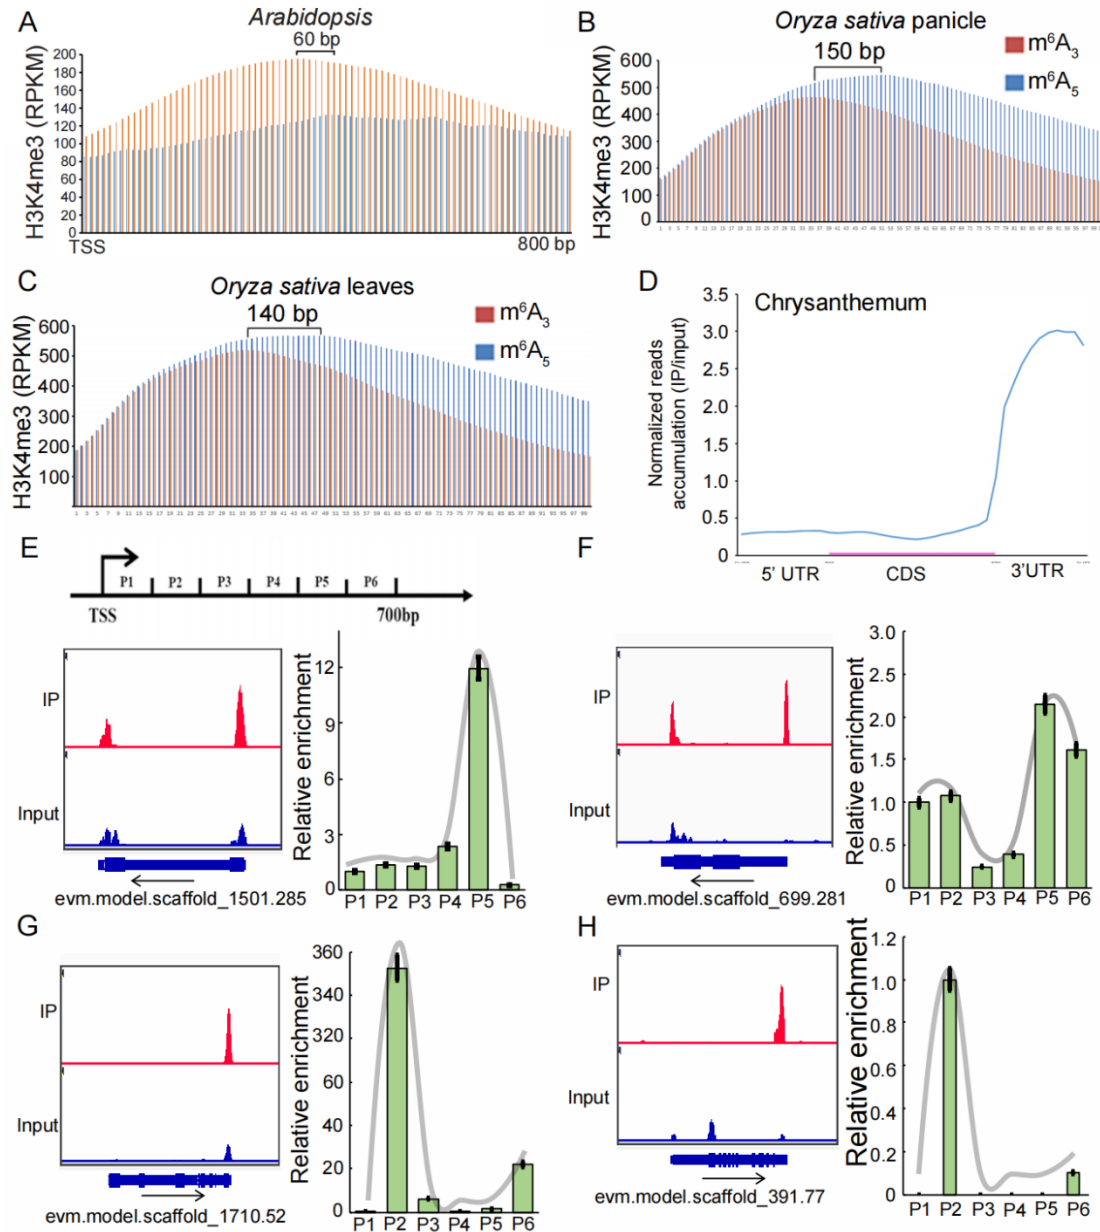

**Fig. S2.** m<sup>6</sup>A methylation deposits in the 5' UTR of mRNA shifted H3K4me3 histone modification. **A-C** Bar plots show the normalized H3K4me3 signal downstream of TSS in leaves of *Arabidopsis* (**A**), panicle (**B**) and leaves (**C**) of *Oryza sativa*. Normalized H3K4me3 signal downstream of the TSS were binned in 10-bp intervals, and the distribution was plotted. The distance between summits was indicated in the figure. m<sup>6</sup>A<sub>3</sub>: genes with m<sup>6</sup>A methylation only in 3' UTR region; m<sup>6</sup>A<sub>5</sub>: genes with m<sup>6</sup>A methylation only in 5' UTR region. **D** Accumulation of m<sup>6</sup>A-IP reads along transcripts in chrysanthemum. Each transcript was divided into three parts: 5' UTRs, CDS and 3' UTRs. **E-H** Genome browser traces and ChIP-qPCR to show the m<sup>6</sup>A enrichment and H3K4me3 modification, respectively, for genes with m<sup>6</sup>A modification specifically in 5' UTR regions (**E-F**) and 3' UTR regions (**G-H**). About 700 bp regions were divided into 6 parts for ChIP-qPCR examination.

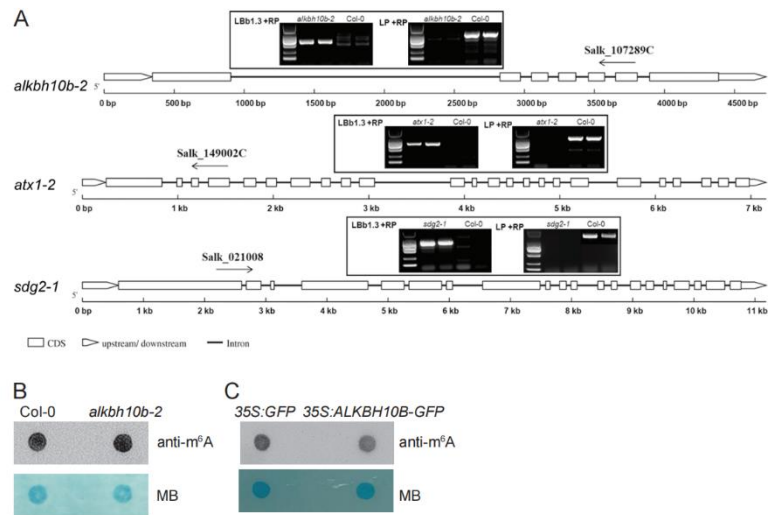

**Fig. S3.** Genotyping of T-DNA insertion mutants and m<sup>6</sup>A levels in different plants. **A** The diagram to show the T-DNA insertion for *alkbh10b-2*, *atx1-2* and *sdg2-1* mutants. Genotyping results were shown. **B-C** m<sup>6</sup>A dot-blot assay to illustrate the overall level variances between Col-0 and *alkbh10b-2* mutant (**B**), and the global change in m<sup>6</sup>A modification in cells expressing *35S:AtALKBH10B-GFP* (**C**).

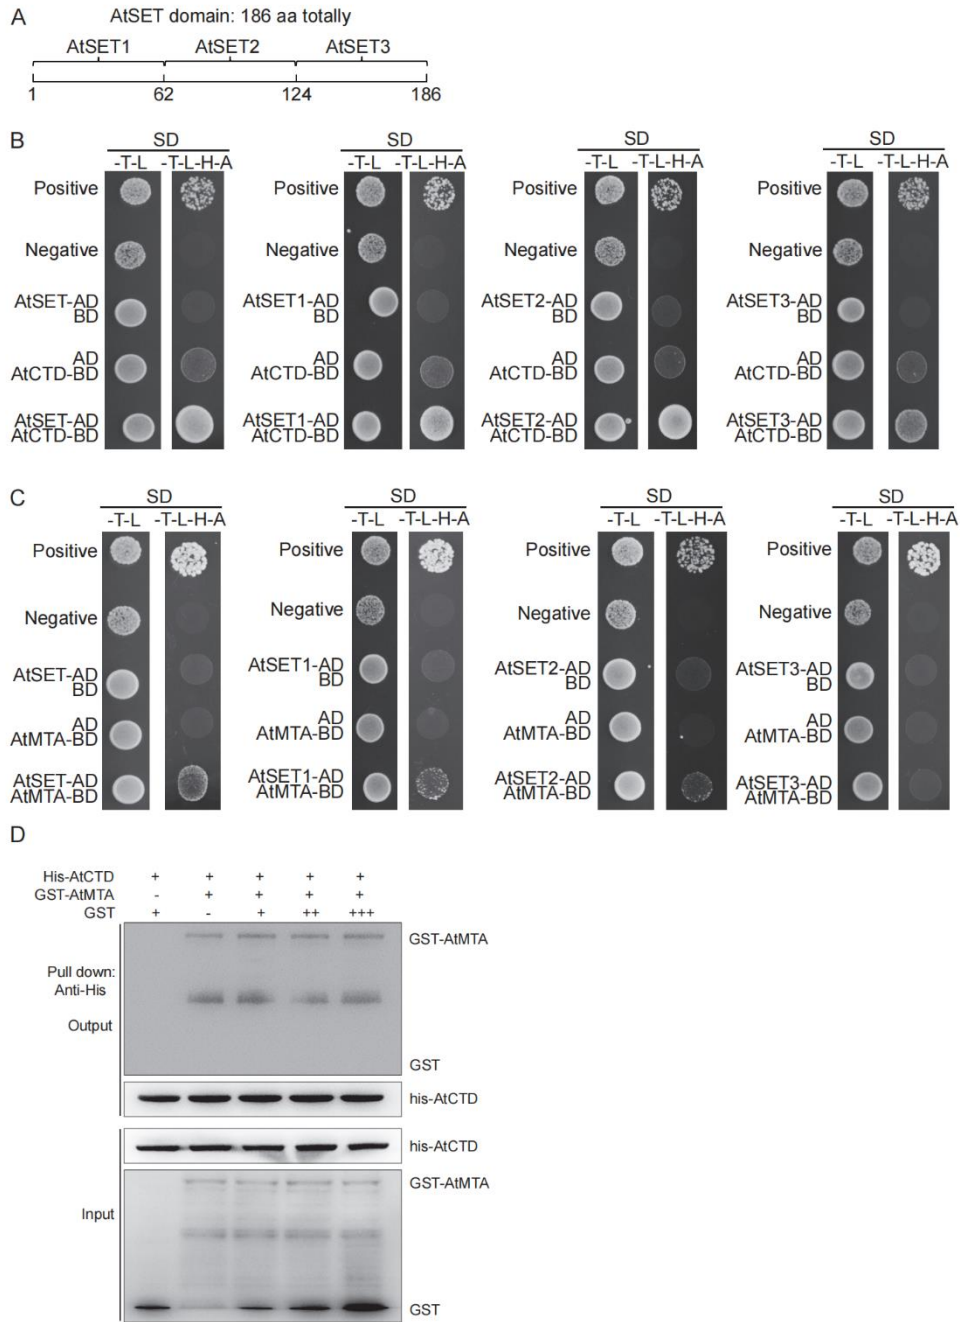

**Fig. S4.** The negative control of MTA and ATX1 interact with CTD of RNA Pol II. **A** The diagram to show the 3 fragments of AtSET domain (AtSET1-3) used for the following assays. **B-C** Y2H assay indicates the interaction between AtCTD and AtSET fragments (**B**), as well as between AtMTA and AtSET fragments (**C**). **D** Pull-down assays to examine the interaction between GST or AtMTA and AtCTD. Increasing concentrations of GST was respectively incubated with a fixed concentration of GST-AtMTA. GST-fusion proteins and GST were detected with an anti-GST antibody. Input means total protein lysate without immunoprecipitation.

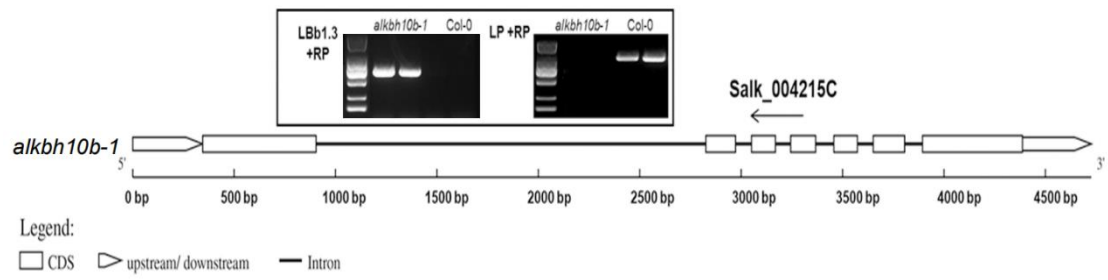

**Fig. S5.** The diagram to show the T-DNA insertion for *alkhh10b-1*. Genotyping results were shown.
